# Supplementary material
Source: Springer Nature journal article supplement (https://www.springermedizin.de/resource/supplementary/13075_2013_4272_MOESM2_ESM.pdf/9696314)
Supplement: MOESM2 [file 9696314]

Supplementary Table 1. Association analysis of rs10975514 with RA in the discovery population

| Characteristic<br>(n) | Allele frequency(%) |               | Genotype frequency(%) |            |           | A vs. G                         | AA vs. AG+GG                    | AA+AG vs. GG                    |
|-----------------------|---------------------|---------------|-----------------------|------------|-----------|---------------------------------|---------------------------------|---------------------------------|
|                       | A                   | G             | AA                    | AG         | GG        | OR(95%CI)<br>P-value            | OR(95%CI)<br>P-value            | OR(95%CI)<br>P-value            |
| CON<br>(598)          | 693<br>(57.9)       | 503<br>(42.1) | 192(32.1)             | 309 (51.7) | 97 (16.2) |                                 |                                 |                                 |
| RA<br>(700)           | 818<br>(58.4)       | 582<br>(41.6) | 235 (33.6)            | 348 (49.7) | 117(16.7) | 1.020<br>(0.872-1.193)          | 1.069<br>(0.847-1.348)          | 0.965<br>(0.719-1.295)          |
| RF+<br>(418)          | 490<br>(58.6)       | 346<br>(41.4) | 143 (34.2)            | 204 (48.8) | 71 (17.0) | 0.811<br>1.028<br>(0.859-1.230) | 0.576<br>1.100<br>(0.843-1.433) | 0.811<br>0.946<br>(0.677-1.323) |
| RF-<br>(84)           | 95<br>(56.5)        | 73<br>(43.5)  | 23 (27.4)             | 49 (58.3)  | 12 (14.3) | 0.763<br>0.945<br>(0.682-1.309) | 0.483<br>0.797<br>(0.479-1.327) | 0.747<br>1.162<br>(0.607-2.222) |
| ACPA+<br>(246)        | 282<br>(57.3)       | 210<br>(42.7) | 75 (30.5)             | 132 (53.7) | 39 (15.9) | 0.732<br>0.975<br>(0.788-1.205) | 0.383<br>0.927<br>(0.673-1.279) | 0.651<br>1.028<br>(0.685-1.541) |
| ACPA-<br>(84)         | 101<br>(60.1)       | 67<br>(39.9)  | 29 (34.5)             | 43 (51.2)  | 12 (14.3) | 0.813<br>1.094<br>(0.787-1.521) | 0.646<br>1.115<br>(0.689-1.804) | 0.895<br>1.162<br>(0.607-2.222) |
| Female CON<br>(412)   | 472<br>(57.3)       | 352<br>(42.7) | 131 (31.8)            | 210 (51.0) | 71(17.2)  |                                 |                                 |                                 |
| Female RA<br>(511)    | 596<br>(58.3)       | 426<br>(41.7) | 169 (33.1)            | 258 (50.5) | 84 (16.4) | 1.043<br>(0.866-1.256)          | 1.060<br>(0.803-1.399)          | 1.058<br>(0.748-1.497)          |
| Female RF+<br>(338)   | 396<br>(58.6)       | 280<br>(41.4) | 113 (33.4)            | 170 (50.3) | 55 (16.3) | 0.654<br>1.055<br>(0.858-1.296) | 0.681<br>1.077<br>(0.793-1.464) | 0.748<br>1.071<br>(0.728-1.576) |
| Female RF-<br>(71)    | 80<br>(56.3)        | 62<br>(43.7)  | 20 (28.2)             | 40 (56.3)  | 11 (15.5) | 0.612<br>0.962<br>(0.672-1.378) | 0.634<br>0.841<br>(0.482-1.468) | 0.726<br>1.136<br>(0.569-2.268) |
| Female ACPA+<br>(5)   | 234                 | 174           | 62 (30.4)             | 110 (53.9) | 32 (15.7) | 0.834<br>1.003                  | 0.543<br>0.937                  | 0.718<br>1.119                  |

|              |        |        |           |           |           |               |               |                |
|--------------|--------|--------|-----------|-----------|-----------|---------------|---------------|----------------|
| (204)        | 7.4)   | (42.6) |           |           |           | (0.789-1.275) | (0.651-1.347) | (0.709-1.765)  |
|              |        |        |           |           |           | 0.981         | 0.724         | 0.628          |
| Female ACPA- | 82     | 52     | 24 (35.8) | 34 (50.7) | 9 (13.4)  | 1.176         | 1.197         | 1.342          |
| (67)         | (61.2) | (38.8) |           |           |           | (0.809-1.709) | (0.697-2.056) | (0.636-2.833)  |
| Male CON     | 136    | 110    | 35 (28.5) | 66(53.7)  | 22 (17.9) | 0.395         | 0.514         | 0.441          |
| (123)        | (55.3) | (44.7) |           |           |           |               |               |                |
| Male RA      | 130    | 100    | 37 (32.2) | 56 (48.7) | 22 (19.1) | 1.051         | 1.193         | 0.921          |
| (115)        | (56.5) | (43.5) |           |           |           | (0.732-1.510) | (0.686-2.075) | (0.478-1.772)  |
| Male RF+     | 93     | 65     | 30 (38.0) | 33 (41.8) | 16 (20.3) | 0.786         | 0.533         | 0.805          |
| (79)         | (58.9) | (41.1) |           |           |           | 1.157         | 1.539         | 0.858          |
| Male RF-     | 13     | 11     | 2 (16.7)  | 9(75.0)   | 1 (8.3)   | (0.772-1.734) | (0.845-2.805) | (0.419-1.756)  |
| (12)         | (54.2) | (45.8) |           |           |           | 0.479         | 0.159         | 0.675          |
| Male ACPA+   | 48     | 36     | 13(31.0)  | 22(52.4)  | 7 (16.7)  | 0.956         | 0.503         | 2.396          |
| (42)         | (57.1) | (42.9) |           |           |           | (0.412-2.217) | (0.105-2.412) | (0.294-19.535) |
| Male ACPA-   | 17     | 11     | 5 (35.7)  | 7 (50.0)  | 2 (14.3)  | 0.916         | 0.390         | 0.414          |
| (14)         | (60.7) | (39.3) |           |           |           | 1.078         | 1.127         | 1.089          |
|              |        |        |           |           |           | (0.654-1.778) | (0.526-2.416) | (0.428-2.770)  |
|              |        |        |           |           |           | 0.767         | 0.758         | 0.858          |
|              |        |        |           |           |           | 1.250         | 1.397         | 1.307          |
|              |        |        |           |           |           | (0.562-2.779) | (0.437-4.461) | (0.273-6.259)  |
|              |        |        |           |           |           | 0.584         | 0.573         | 0.738          |

\* $P < 0.05$  vs controls; RA, rheumatoid arthritis; CON, healthy controls; RF, rheumatoid factor; ACPA, anti-citrullinated proteins antibodies; OR, Odds ratio; CI, confidence interval.

Supplementary Table 2. Association analysis of rs10975514 with RA in the validation population

| Characteristic<br>(n) | Allele frequency(%) |               | Genotype frequency(%) |            |           | A vs. G                         | AA vs. AG+GG                    | AA+AG vs. GG                    |
|-----------------------|---------------------|---------------|-----------------------|------------|-----------|---------------------------------|---------------------------------|---------------------------------|
|                       | A                   | G             | AA                    | AG         | GG        | OR(95%CI)<br>P-value            | OR(95%CI)<br>P-value            | OR(95%CI)<br>P-value            |
| CON<br>(456)          | 524<br>(57.5)       | 388<br>(42.5) | 149(32.7)             | 226 (49.6) | 81 (17.8) |                                 |                                 |                                 |
| RA<br>(586)           | 687<br>(58.6)       | 485<br>(41.4) | 200 (34.1)            | 287(49.0)  | 99(16.9)  | 1.049<br>(0.880-1.250)          | 1.068<br>(0.823-1.384)          | 1.063<br>(0.769-1.468)          |
| RF+<br>(357)          | 426<br>(59.7)       | 288<br>(40.3) | 125 (35.0)            | 176 (49.3) | 56 (15.7) | 0.594<br>1.095<br>(0.898-1.336) | 0.622<br>1.110<br>(0.829-1.487) | 0.713<br>1.161<br>(0.800-1.686) |
| RF-<br>(104)          | 118<br>(56.7)       | 90<br>(43.3)  | 35 (33.7)             | 48 (46.2)  | 21 (20.2) | 0.370<br>0.971<br>(0.716-1.316) | 0.484<br>1.045<br>(0.666-1.641) | 0.433<br>0.854<br>(0.500-1.459) |
| ACPA+<br>(312)        | 379<br>(60.7)       | 245<br>(39.3) | 113 (36.2)            | 153 (49.0) | 46 (14.7) | 0.849<br>1.145<br>(0.931-1.410) | 0.848<br>1.170<br>(0.864-1.583) | 0.563<br>1.249<br>(0.842-1.853) |
| ACPA-<br>(60)         | 63<br>(52.5)        | 57<br>(47.5)  | 17 (28.3)             | 29 (48.3)  | 14 (23.3) | 0.199<br>0.818<br>(0.559-1.199) | 0.309<br>0.815<br>(0.449-1.476) | 0.269<br>0.710<br>(0.372-1.352) |
| Female CON<br>(415)   | 482<br>(58.1)       | 348<br>(41.9) | 140 (33.7)            | 202 (48.7) | 73(17.6)  | 0.303                           | 0.499                           | 0.297                           |
| Female RA<br>(411)    | 477<br>(58.0)       | 345<br>(42.0) | 136 (33.1)            | 205(49.9)  | 70 (17.0) | 0.998<br>(0.821-1.214)          | 0.971<br>(0.727-1.297)          | 1.040<br>(0.725-1.491)          |
| Female RF+<br>(286)   | 340<br>(59.4)       | 232<br>(40.6) | 98(34.3)              | 144 (50.3) | 44 (15.4) | 0.986<br>1.058<br>(0.852-1.314) | 0.844<br>1.024<br>(0.745-1.407) | 0.832<br>1.174<br>(0.780-1.767) |
|                       |                     |               |                       |            |           | 0.609                           | 0.884                           | 0.442                           |

|                       |               |               |           |            |           |                                 |                                 |                                 |
|-----------------------|---------------|---------------|-----------|------------|-----------|---------------------------------|---------------------------------|---------------------------------|
| Female RF–<br>(86)    | 100<br>(58.1) | 72<br>(41.9)  | 30 (34.9) | 40 (46.5)  | 16 (18.6) | 1.003<br>(0.719-1.399)          | 1.052<br>(0.646-1.714)          | 0.934<br>(0.513-1.700)          |
| Female ACPA+<br>(252) | 302<br>(59.9) | 202<br>(40.1) | 86 (34.1) | 130 (51.6) | 36 (14.3) | 0.987<br>1.079<br>(0.862-1.352) | 0.838<br>1.018<br>(0.731-1.416) | 0.823<br>1.281<br>(0.830-1.977) |
| Female ACPA–<br>(47)  | 53<br>(56.4)  | 34<br>(43.6)  | 15 (31.9) | 23 (48.9)  | 9(19.1)   | 0.506<br>1.125<br>(0.716-1.769) | 0.917<br>0.921<br>(0.483-1.757) | 0.264<br>0.901<br>(0.418-1.945) |
| Male CON<br>(41)      | 42<br>(51.2)  | 40<br>(48.8)  | 9(22.0)   | 24(58.5)   | 8 (19.5)  | 0.608                           | 0.802                           | 0.791                           |
| Male RA<br>(51)       | 52<br>(51.0)  | 50<br>(49.0)  | 12 (23.5) | 28 (54.9)  | 11 (21.6) | 0.990<br>(0.554-1.772)          | 1.094<br>(0.410-2.923)          | 0.882<br>(0.318-2.446)          |
| Male RF+<br>(36)      | 39<br>(54.2)  | 33<br>(45.8)  | 9 (25.0)  | 21 (58.3)  | 6 (16.7)  | 0.974<br>1.126<br>(0.597-2.123) | 0.858<br>1.185<br>(0.412-3.409) | 0.809<br>1.212<br>(0.377-3.899) |
| Male RF–<br>(13)      | 11<br>(42.3)  | 15<br>(57.7)  | 2 (15.4)  | 7(53.8)    | 4 (30.8)  | 0.715<br>0.698<br>(0.287-1.701) | 0.753<br>0.646<br>(0.121-3.463) | 0.747<br>0.545<br>(0.133-2.231) |
| Male ACPA+<br>(25)    | 27<br>(54.0)  | 23<br>(46.0)  | 8(32.0)   | 11(44.0)   | 6 (24.0)  | 0.428<br>1.118<br>(0.553-2.262) | 0.610<br>1.673<br>(0.546-5.125) | 0.399<br>0.768<br>(0.231-2.548) |
| Male ACPA–<br>(9)     | 6<br>(33.3)   | 12<br>(66.7)  | 0 (0)     | 6 (66.7)   | 3 (33.3)  | 0.756<br>0.476<br>(0.163-1.390) | 0.367<br>0.000<br>(0.000- )     | 0.666<br>0.485<br>(0.099-2.370) |
|                       |               |               |           |            |           | 0.169                           | 0.999                           | 0.371                           |

\* $P < 0.05$  vs controls; RA, rheumatoid arthritis; CON, healthy controls; RF, rheumatoid factor; ACPA, anti-citrullinated proteins antibodies; OR, Odds ratio; CI, confidence interval.

Supplementary Table 3. Association analysis of rs10975514 with RA in the replication population

| Characteristic<br>(n) | Allele frequency(%) |               | Genotype frequency(%) |            |            | A vs. G                         | AA vs. AG+GG                    | AA+AG vs. GG                    |
|-----------------------|---------------------|---------------|-----------------------|------------|------------|---------------------------------|---------------------------------|---------------------------------|
|                       | A                   | G             | AA                    | AG         | GG         | OR(95%CI)<br>P-value            | OR(95%CI)<br>P-value            | OR(95%CI)<br>P-value            |
| CON<br>(701)          | 830<br>(59.2)       | 572<br>(40.8) | 266(37.9)             | 298(42.5)  | 137 (19.5) |                                 |                                 |                                 |
| RA<br>(666)           | 804<br>(60.4)       | 528<br>(39.6) | 248(37.2)             | 308(46.2)  | 110(16.5)  | 1.049<br>(0.901-1.223)          | 0.970<br>(0.779-1.208)          | 1.228<br>(0.931-1.620)          |
| RF+<br>(327)          | 393<br>(60.1)       | 261<br>(39.9) | 123 (37.6)            | 147 (45.0) | 57 (17.4)  | 0.537<br>1.038<br>(0.859-1.254) | 0.787<br>0.986<br>(0.752-1.293) | 0.146<br>1.151<br>(0.818-1.619) |
| RF-<br>(61)           | 72<br>(59.0)        | 50<br>(41.0)  | 20 (32.8)             | 32 (52.5)  | 9 (14.8)   | 0.702<br>0.992<br>(0.681-1.446) | 0.919<br>0.798<br>(0.458-1.391) | 0.420<br>1.403<br>(0.675-2.918) |
| ACPA+<br>(221)        | 269<br>(60.9)       | 173<br>(39.1) | 82 (37.1)             | 105 (47.5) | 34 (15.4)  | 0.968<br>1.072<br>(0.861-1.334) | 0.426<br>0.965<br>(0.706-1.319) | 0.364<br>1.336<br>(0.886-2.014) |
| ACPA-<br>(41)         | 48<br>(58.5)        | 34<br>(41.5)  | 15 (36.6)             | 18 (43.9)  | 8 (19.5)   | 0.536<br>0.973<br>(0.619-1.529) | 0.822<br>0.943<br>(0.491-1.814) | 0.166<br>1.002<br>(0.453-2.218) |
| Female CON<br>(507)   | 614<br>(60.6)       | 400<br>(39.4) | 203 (40.0)            | 208 (41.0) | 96(18.9)   |                                 |                                 |                                 |
| Female RA<br>(461)    | 541<br>(58.7)       | 381<br>(41.3) | 162 (35.1)            | 217(47.1)  | 82 (17.8)  | 0.925<br>(0.771-1.109)          | 0.811<br>(0.625-1.053)          | 1.080<br>(0.779-1.496)          |
| Female RF+<br>(263)   | 311<br>(59.1)       | 215<br>(40.9) | 95(36.1)              | 121(46.0)  | 47 (17.9)  | 0.401<br>0.942<br>(0.760-1.168) | 0.116<br>0.847<br>(0.622-1.152) | 0.645<br>1.073<br>(0.730-1.579) |
| Female RF-<br>(52)    | 61<br>(58.7)        | 43<br>(41.3)  | 17 (32.7)             | 27 (51.9)  | 8 (15.4)   | 0.588<br>0.924<br>(0.613-1.393) | 0.290<br>0.727<br>(0.397-1.333) | 0.719<br>1.285<br>(0.586-2.818) |
| Female ACPA+<br>(52)  | 205                 | 147           | 58 (33.0)             | 89 (50.6)  | 29 (16.5)  | 0.706<br>0.909                  | 0.303<br>0.736                  | 0.532<br>1.184                  |

|              |        |        |           |           |           |               |               |                |
|--------------|--------|--------|-----------|-----------|-----------|---------------|---------------|----------------|
| (176)        | (58.2) | (41.8) |           |           |           | (0.710-1.162) | (0.513-1.056) | (0.750-1.868)  |
|              |        |        |           |           |           | 0.445         | 0.096         | 0.468          |
| Female ACPA- | 42     | 28     | 13 (37.1) | 16 (45.7) | 6(17.1)   | 0.977         | 0.885         | 1.129          |
| (35)         | (60.0) | (40.0) |           |           |           | (0.596-1.602) | (0.436-1.797) | (0.456-2.795)  |
| Male CON     | 136    | 104    | 42(35.0)  | 52(43.3)  | 26 (21.7) | 0.927         | 0.735         | 0.793          |
| (120)        | (56.7) | (43.3) |           |           |           |               |               |                |
| Male RA      | 127    | 65     | 45 (46.9) | 37 (38.5) | 14 (14.6) | 1.494         | 1.639         | 1.620          |
| (96)         | (66.1) | (33.9) |           |           |           | (1.008-2.214) | (0.946-2.837) | (0.793-3.309)  |
| Male RF+     | 73     | 35     | 27 (50.0) | 19 (35.2) | 8 (14.8)  | 0.045         | 0.078         | 0.185          |
| (54)         | (67.6) | (32.4) |           |           |           | 1.595         | 1.857         | 1.590          |
| Male RF-     | 11     | 7      | 3 (33.3)  | 5(55.6)   | 1 (11.1)  | (0.990-2.570) | (0.967-3.565) | (0.668-3.786)  |
| (9)          | (61.1) | (38.9) |           |           |           | 0.054         | 0.063         | 0.294          |
| Male ACPA+   | 64     | 24     | 24(54.5)  | 16(36.4)  | 4 (9.1)   | 1.202         | 0.929         | 2.213          |
| (44)         | (72.7) | (27.3) |           |           |           | (0.450-3.206) | (0.221-3.903) | (0.265-18.504) |
| Male ACPA-   | 6      | 6      | 2 (33.3)  | 2 (33.3)  | 2 (33.3)  | 0.713         | 0.919         | 0.464          |
| (6)          | (50.0) | (50.0) |           |           |           | 2.039         | 2.229         | 2.766          |
|              |        |        |           |           |           | (1.195-3.479) | (1.104-4.497) | (0.906-8.442)  |
|              |        |        |           |           |           | 0.008         | 0.025         | 0.074          |
|              |        |        |           |           |           | 0.765         | 0.929         | 0.553          |
|              |        |        |           |           |           | (0.240-2.439) | (0.163-5.282) | (0.096-3.190)  |
|              |        |        |           |           |           | 0.650         | 0.933         | 0.508          |

\* $P < 0.05$  vs controls; RA, rheumatoid arthritis; CON, healthy controls; RF, rheumatoid factor; ACPA, anti-citrullinated proteins antibodies; OR, Odds ratio; CI, confidence interval.
